# Supplementary material
Source: MDPI journal article supplement (https://www.mdpi.com/2073-4344/12/6/670)
Supplement: s1 [file s1]

# Electronic Supplementary Information

## Graphyne Nanotubes as Promising Sodium-Ion Battery Anodes

Yuan Yuan <sup>a, #</sup>, Xiaoxue Song <sup>b, #</sup>, Jiapeng Ma <sup>a</sup>, Yanqi Chen <sup>a</sup>, Fang-Fang Wang <sup>a</sup>,  
Baotao Kang <sup>a, b, \*</sup> and Jin Yong Lee <sup>b, \*</sup>

<sup>a</sup> School of Chemistry and Chemical Engineering, University of Jinan, Jinan,  
Shandong 250022, P. R. China

E-mail: chm\_kangbt@ujn.edu.cn

<sup>b</sup> Department of Chemistry, Sungkyunkwan University, Suwon, 16419, Republic of  
Korea

E-mail: jinylee@skku.edu

### Table of contents

|                                                                                                                                                                                                                           |   |
|---------------------------------------------------------------------------------------------------------------------------------------------------------------------------------------------------------------------------|---|
| <b>Figure S 1</b> Optimized structure of all studied $\alpha$ GyNTs. ....                                                                                                                                                 | 2 |
| <b>Figure S 2</b> Optimized structure of all studied $\beta$ GyNTs. ....                                                                                                                                                  | 3 |
| <b>Figure S 3</b> Optimized structure of all studied $\gamma$ GyNTs.....                                                                                                                                                  | 4 |
| <b>Figure S 4</b> Optimized structure of $\alpha$ Gy (a), $\beta$ Gy (b) and $\gamma$ Gy (c) when reaching<br>the maximum storage Na capacities. ....                                                                     | 5 |
| <b>Figure S 5</b> Optimized geometries with maximum storage capacity of (a) (2, 2)-<br>$\alpha$ GyNT, (b) (3, 3)- $\alpha$ GyNT, (c) (4, 4)- $\alpha$ GyNT, (d) (4, 0)- $\alpha$ GyNT, (e) (5, 0)-<br>$\alpha$ GyNT. .... | 6 |
| <b>Figure S 6</b> Optimized geometries with maximum storage capacity of (a) (2, 2)-<br>$\beta$ GyNT, (b) (3, 3)- $\beta$ GyNT, (c) (4, 4)- $\beta$ GyNT, (d) (3, 0)- $\beta$ GyNT, (e) (4, 0)-<br>$\beta$ GyNT. ....      | 7 |
| <b>Figure S 7</b> Optimized geometries with maximum storage capacity of (a) (2, 2)-<br>$\gamma$ GyNT, (b) (3, 3)- $\gamma$ GyNT, (c) (4, 4)- $\gamma$ GyNT, (d) (3, 0)- $\gamma$ GyNT, (e) (5, 0)-<br>$\gamma$ GyNT.....  | 8 |
| <b>Figure S 8</b> Energy surfaces of Na diffusion on (a) $\alpha$ Gy, (b) $\beta$ Gy, (c) $\gamma$ Gy, and Na<br>penetrates on (d) $\gamma$ Gy. ....                                                                      | 9 |

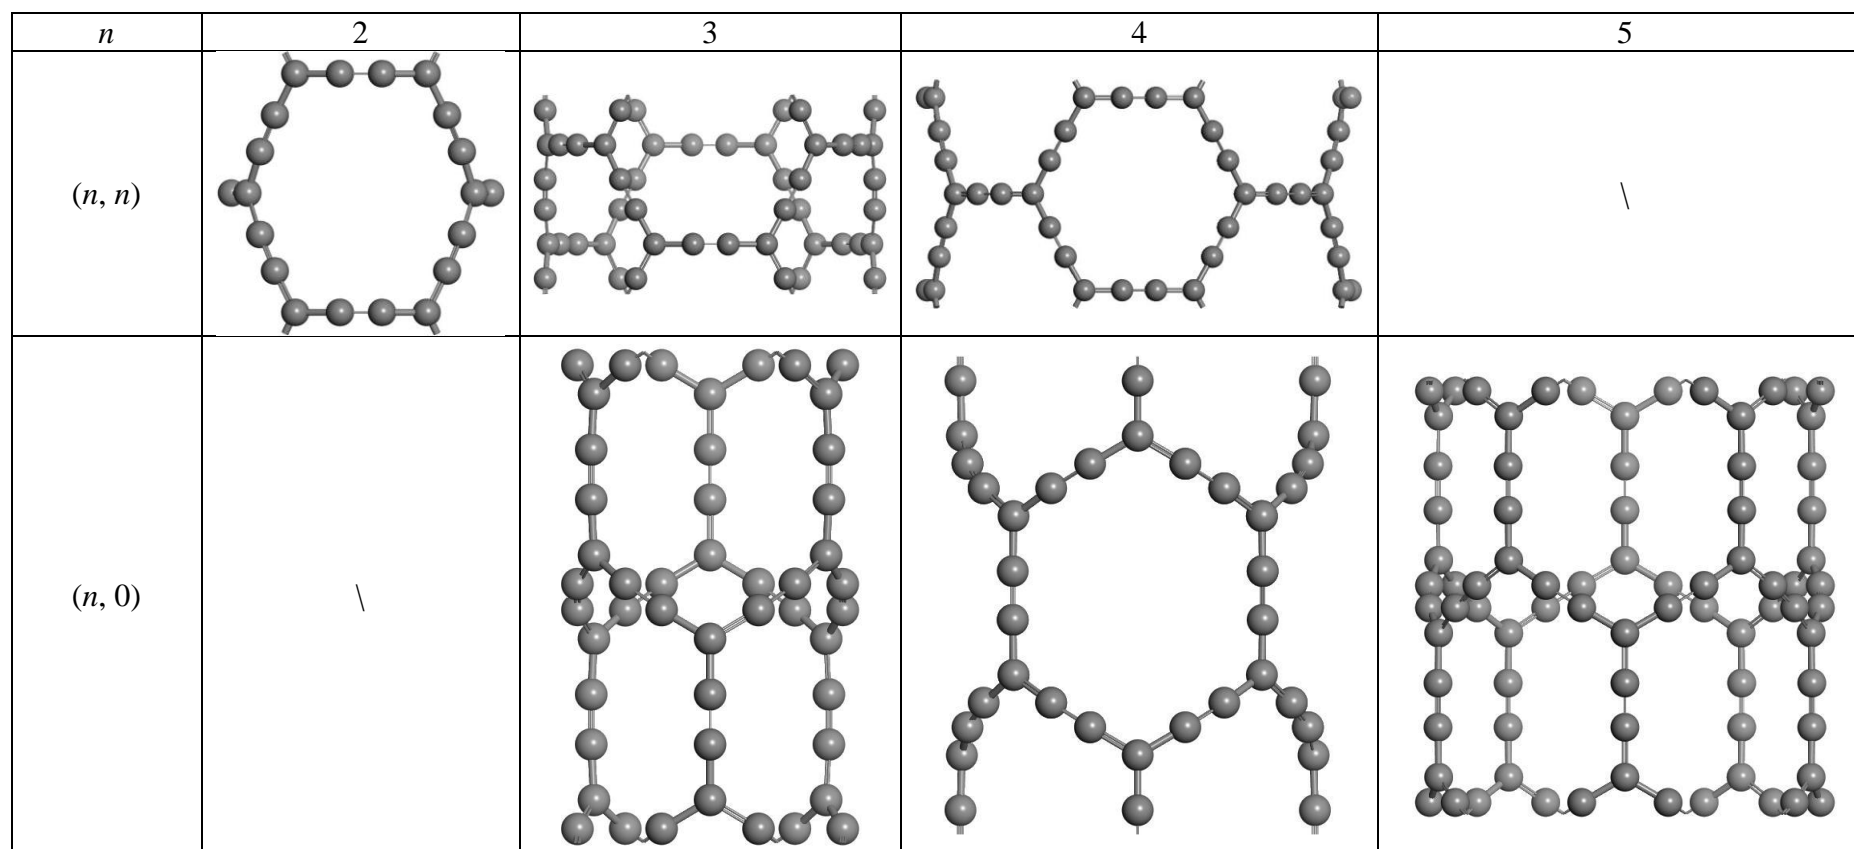

**Figure S 1** Optimized structure of all studied  $\alpha$ GyNTs.

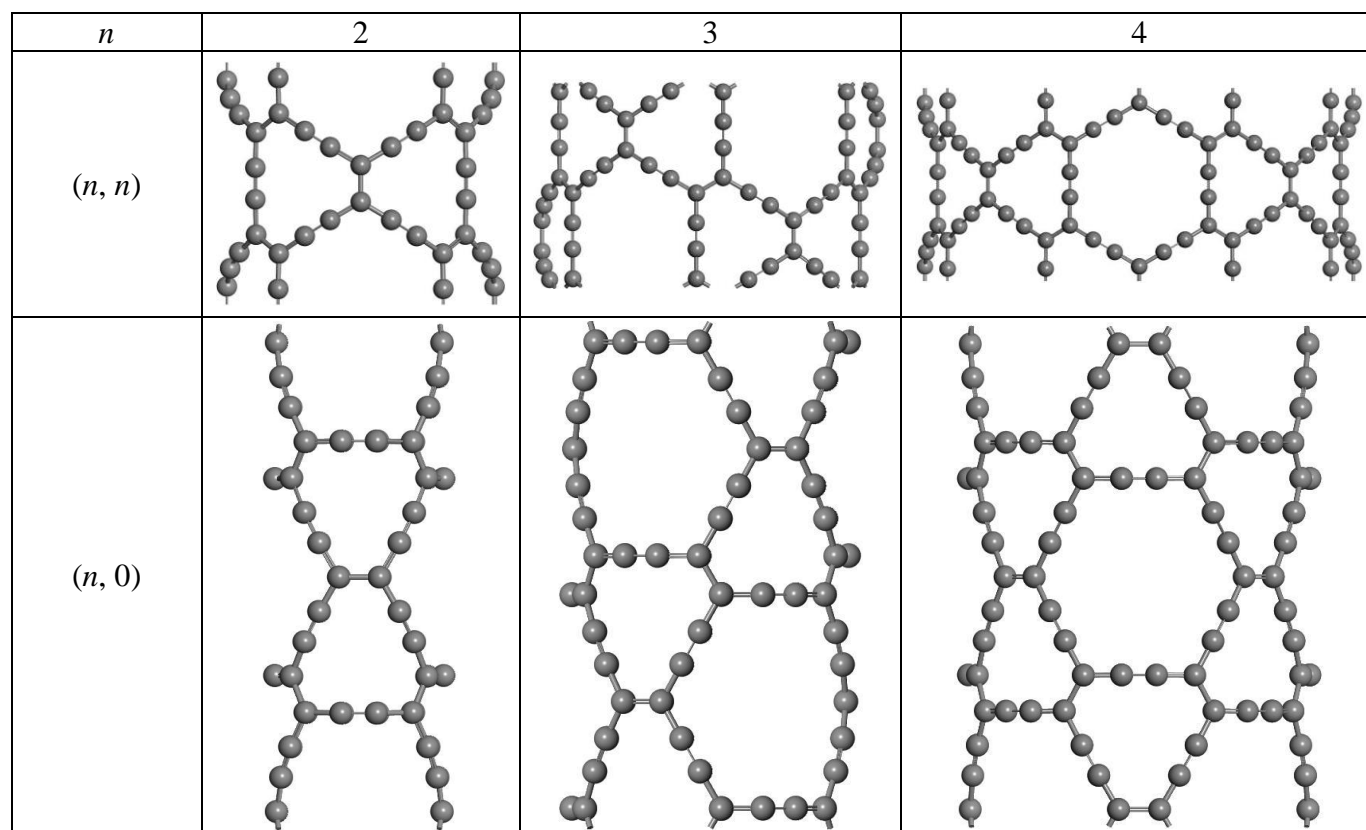

**Figure S 2** Optimized structure of all studied  $\beta$ GyNTs.

| $n$      | 2                                                                                 | 3                                                                                  | 4                                                                                    | 5                                                                                    |
|----------|-----------------------------------------------------------------------------------|------------------------------------------------------------------------------------|--------------------------------------------------------------------------------------|--------------------------------------------------------------------------------------|
| $(n, n)$ | 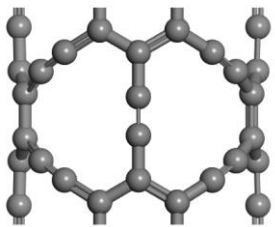 |  |   |   |
| $(n, 0)$ |  |  |  |  |

**Figure S 3** Optimized structure of all studied  $\gamma$ GyNTs.

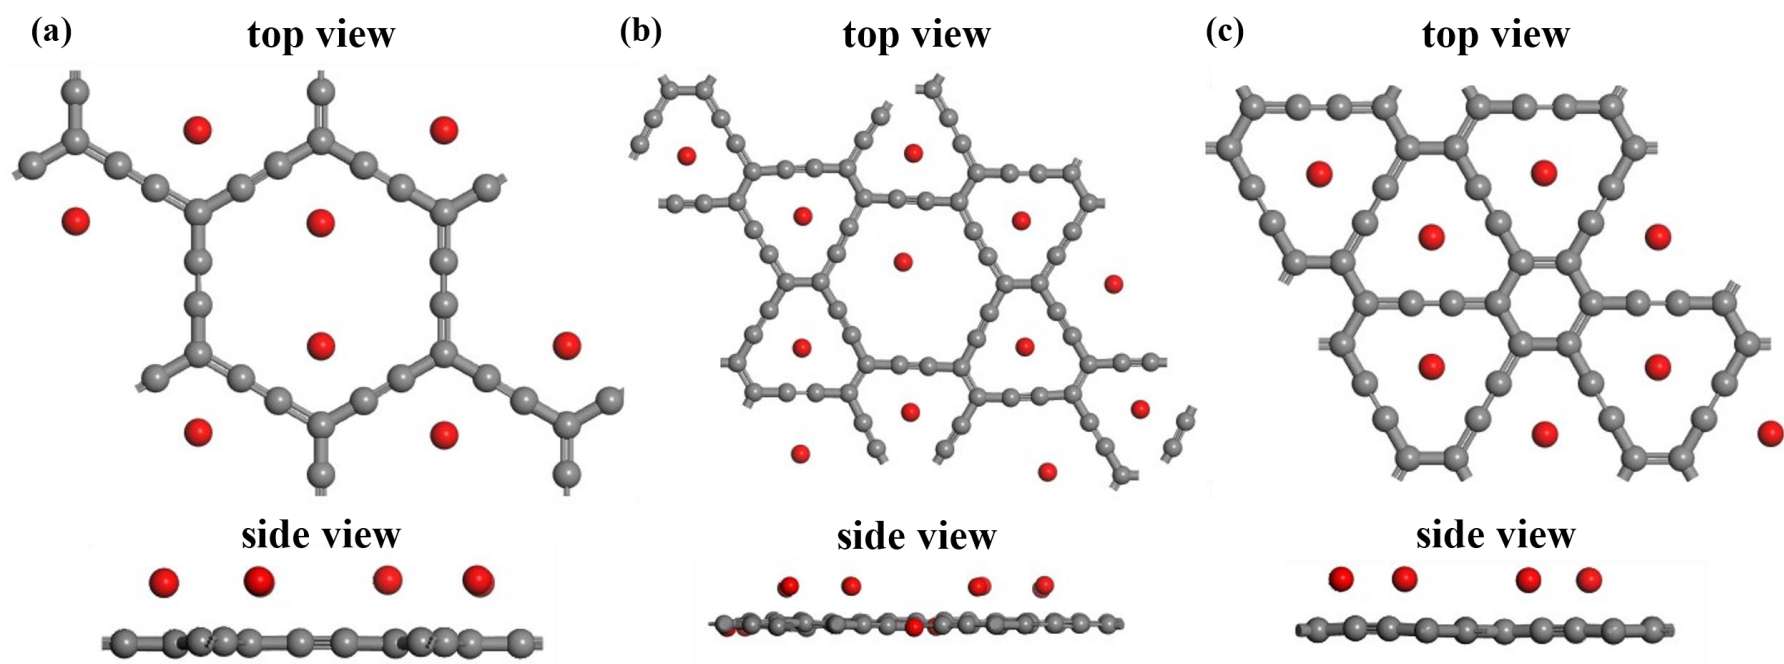

**Figure S 4** Optimized structure of  $\alpha$ Gy (a),  $\beta$ Gy (b) and  $\gamma$ Gy (c) when reaching the maximum storage Na capacities.

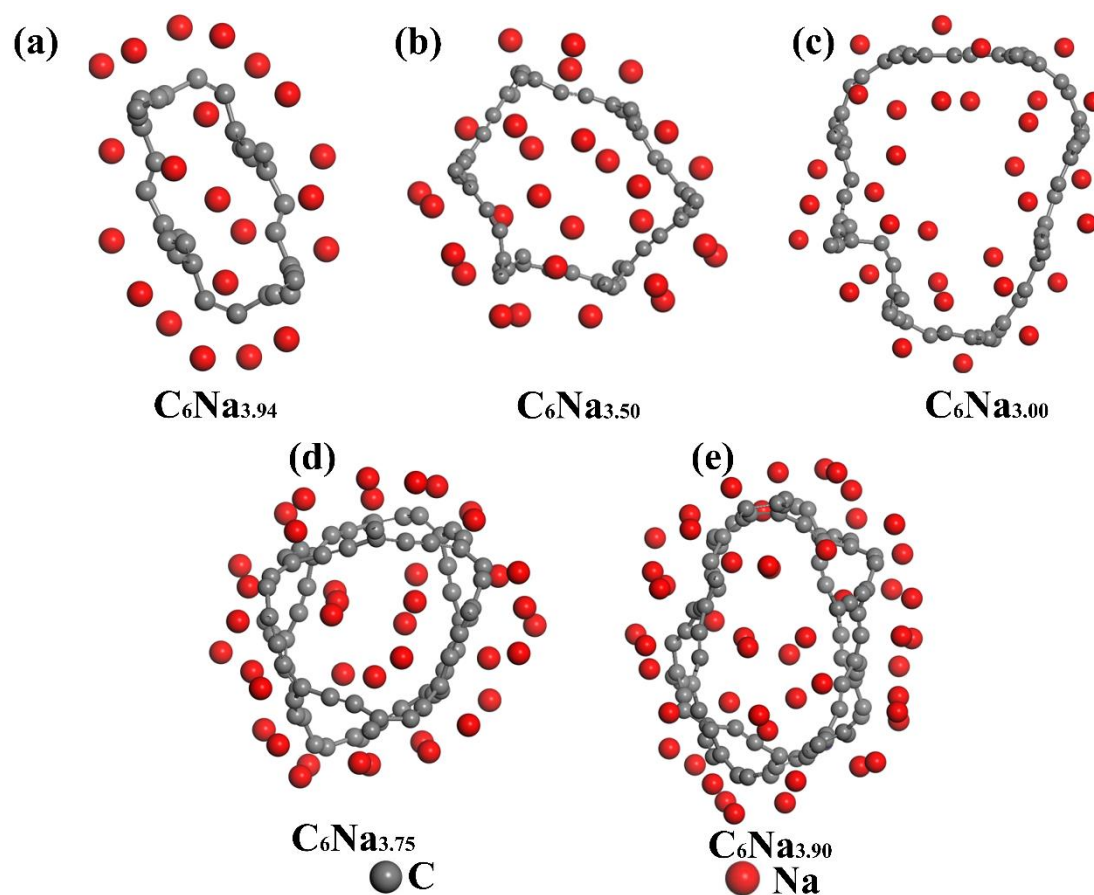

**Figure S 5** Optimized geometries with maximum storage capacity of (a) (2, 2)- $\alpha$ GyNT, (b) (3, 3)- $\alpha$ GyNT, (c) (4, 4)- $\alpha$ GyNT, (d) (4, 0)- $\alpha$ GyNT, (e) (5, 0)- $\alpha$ GyNT.

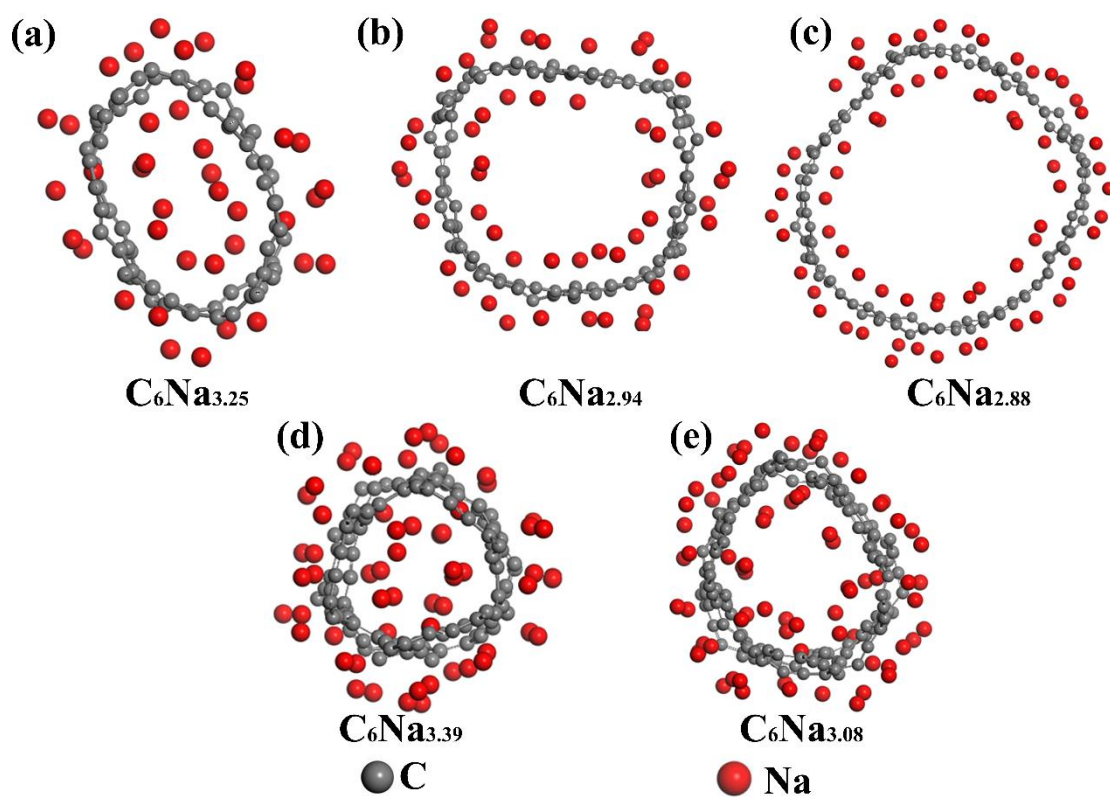

**Figure S 6** Optimized geometries with maximum storage capacity of (a) (2, 2)-  $\beta\text{GyNT}$ , (b) (3, 3)-  $\beta\text{GyNT}$ , (c) (4, 4)-  $\beta\text{GyNT}$ , (d) (3, 0)-  $\beta\text{GyNT}$ , (e) (4, 0)-  $\beta\text{GyNT}$ .

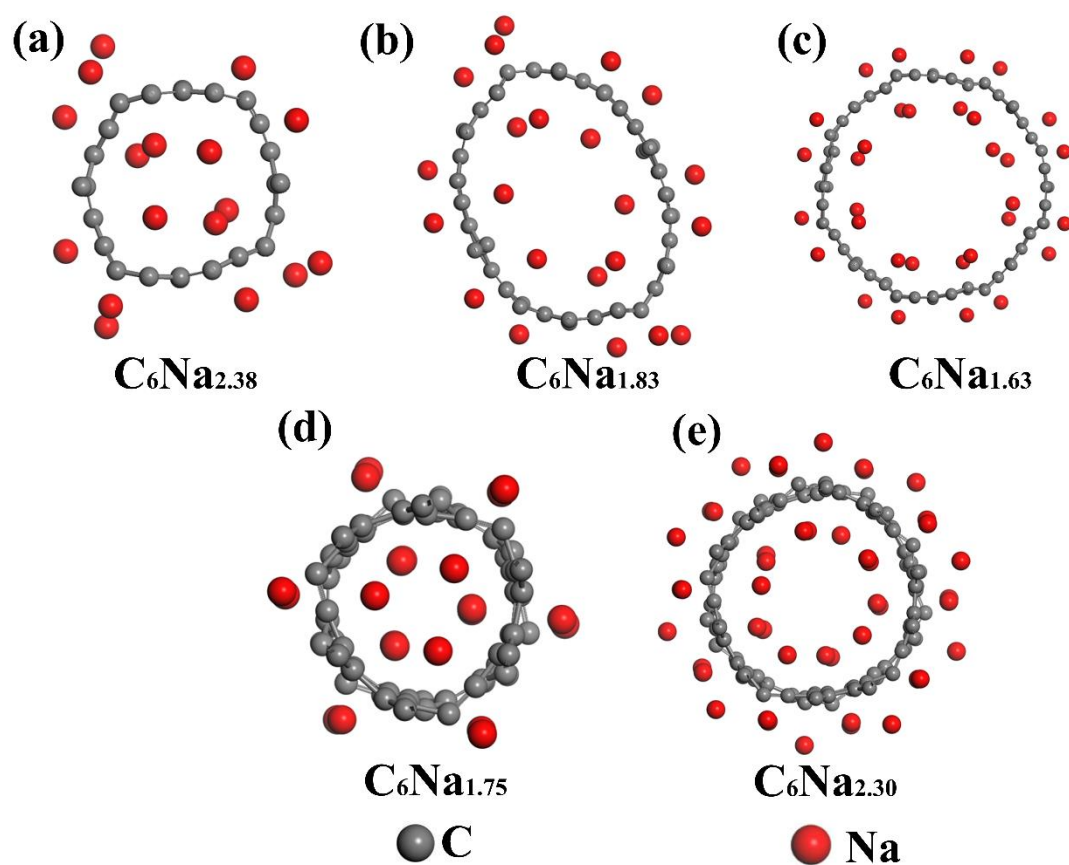

**Figure S 7** Optimized geometries with maximum storage capacity of (a) (2, 2)- $\gamma$ GyNT, (b) (3, 3)-  $\gamma$ GyNT, (c) (4, 4)-  $\gamma$ GyNT, (d) (3, 0)-  $\gamma$ GyNT, (e) (5, 0)-  $\gamma$ GyNT.



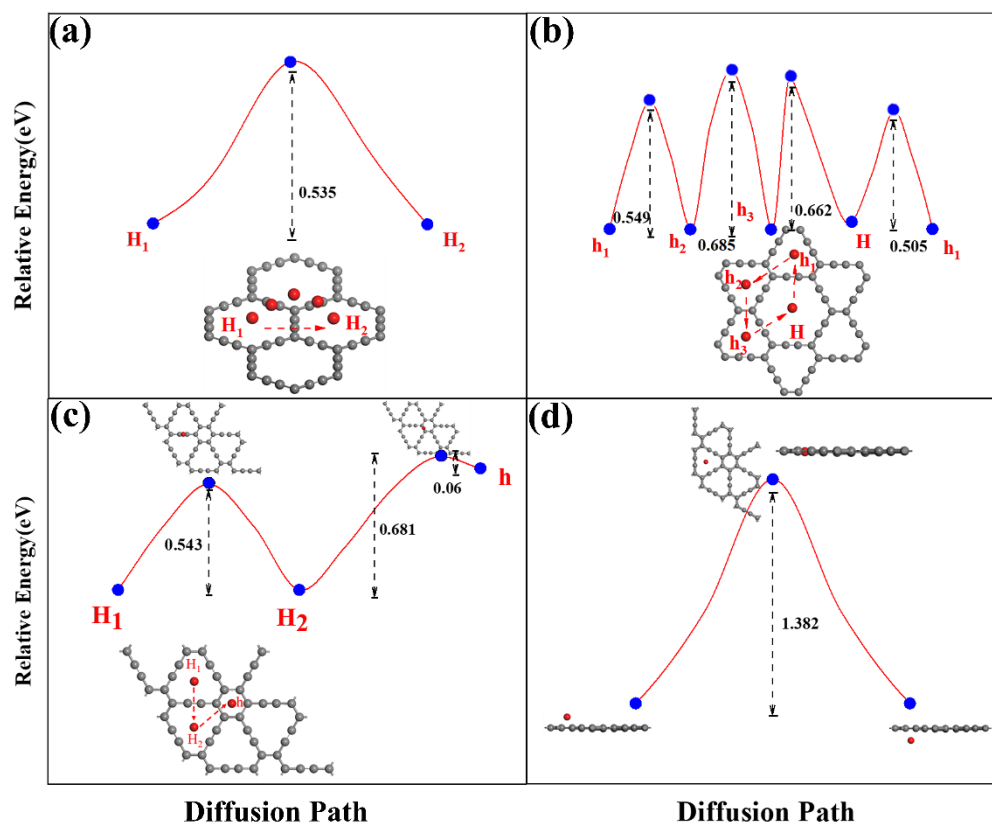

**Figure S 8** Energy surfaces of Na diffusion on (a)  $\alpha$ Gy, (b)  $\beta$ Gy, (c)  $\gamma$ Gy, and Na penetrates on (d)  $\gamma$ Gy.
